# Supplementary material
Source: PubMed Central journal article supplement (PMC4694274)
Supplement: ijcem0008-17818-f6.pdf [file ijcem0008-17818-f6.pdf]

Application of 3DR in selection of TSO with robot

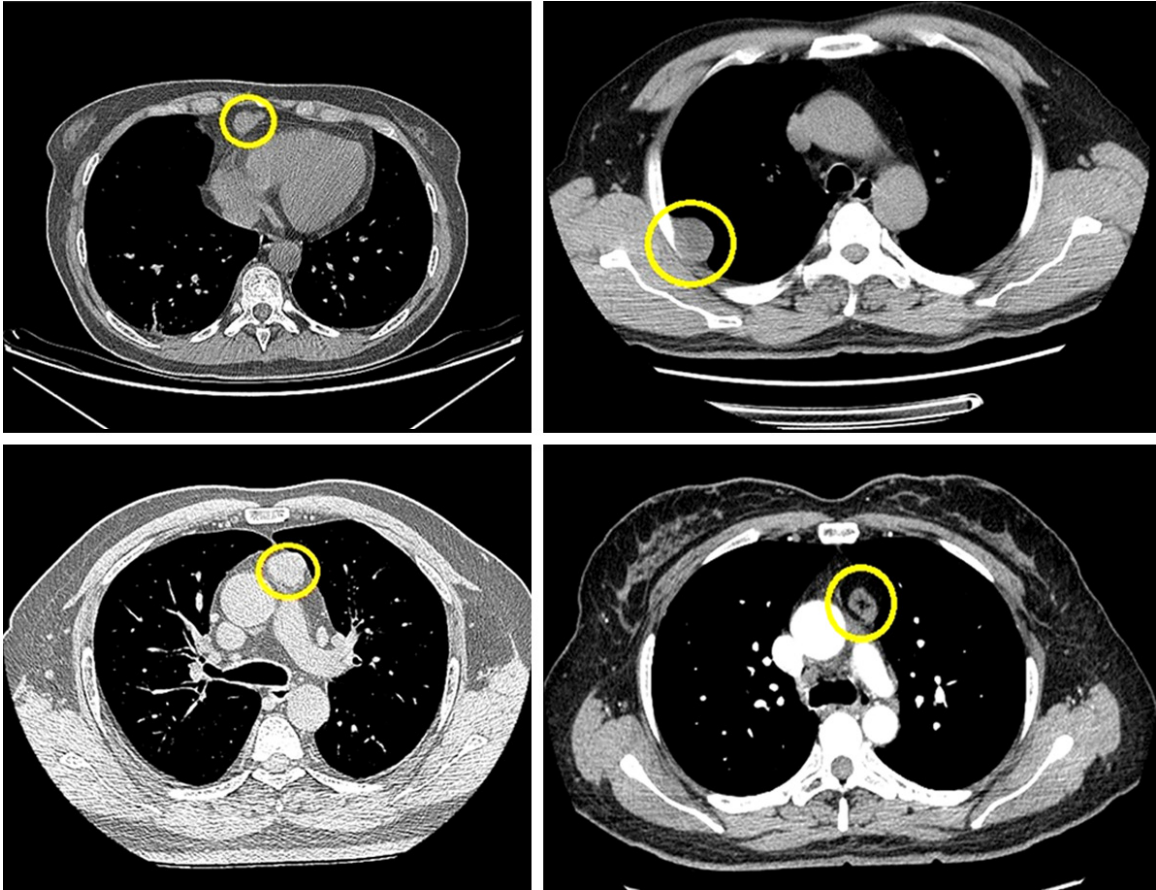

**Supplementary Figure 1.** Actual locations of the tumor in thoracic CT slices obtained from the 4 different patients enrolled in the current study.
